# Supplementary material for: Immobilization of Co-containing polyoxometalates in MIL-101(Cr): structural integrity versus chemical transformation
Source: Royal Society of Chemistry journal article supplement (doi:10.1039/c4dt01286k), 2014-01-01

*Electronic Supplementary Information*

**Immobilization of Co-containing Polyoxometalates in MIL-101(Cr): Structural Integrity  
versus Chemical Transformation**

**William Salomon, François-Joseph Yazigi, Catherine Roch-Marchal,\* Pierre Mialane, Patricia Horcajada,  
Christian Serre, Mohamed Haouas, Francis Taulelle and Anne Dolbecq\***

*Institut Lavoisier de Versailles, UMR 8180, Université de Versailles Saint-Quentin en Yvelines, 45 Avenue des  
Etats-Unis, 78035 Versailles cedex, France.*

*E-mail: catherine.roch@uvsq.fr (C.R.-M.), anne.dolbecq@uvsq.fr (A.D.)*

### Synthesis of MIL-101(Cr):

A mixture of  $\text{Cr}(\text{NO}_3)_3 \cdot 9\text{H}_2\text{O}$  (2 g, 5 mmol), 1,4-benzene-dicarboxylic acid (terephthalic acid, 1.4 g, 8.4 mmol) and 25 mL of distilled water was added in a Teflon container inside an autoclave. Then the autoclave was heated for 9 h at 493 K in an oven under static conditions. Once the synthesis was completed, the solid product was filtered off using a glass filter with a pore size between 40 and 100  $\mu\text{m}$  to remove free terephthalic acid. Then the solid product was washed with water several times, dried with ethanol and diethyl ether. The activation of the MIL-101(Cr) (extraction of the terephthalic acid encapsulated into the pores) was performed thanks to a soxhlet extractor with ethanol under reflux conditions as described for MIL-101 $\text{NH}_2$ (Al). Yield: 53% (based on Cr). Elemental analysis is in agreement with the following formula  $[\text{Cr}^{\text{III}}_3(\text{H}_2\text{O})_3\text{O}(\text{O}_2\text{CC}_6\text{H}_4\text{CO}_2)_3]\text{NO}_3 \cdot 2\text{EtOH}$ . Anal. Calcd (Found) for  $\text{Cr}_3\text{H}_{30}\text{O}_{21}\text{C}_{28}\text{N}$ : C 38.54 (38.50), H 3.45 (3.39), N 1.60 (1.44). The solvent molecules are removed by standing in water before drying the solid in an oven at 393 K overnight before the impregnation experiments.

1. M. Hartmann, and M. Fischer, *Microporous Mesoporous Mater.*, 2012, **164**, 38.

**Figure S1.** X-Ray diffraction patterns of the POM precursor, MIL-101(Cr), POM@MIL and POM@MIL<sup>+</sup> after exchange with LiCl for a)  $PW_{11}Co$ , b)  $P_2W_{18}Co_4$  and c)  $Co_7$ -Ale POM.

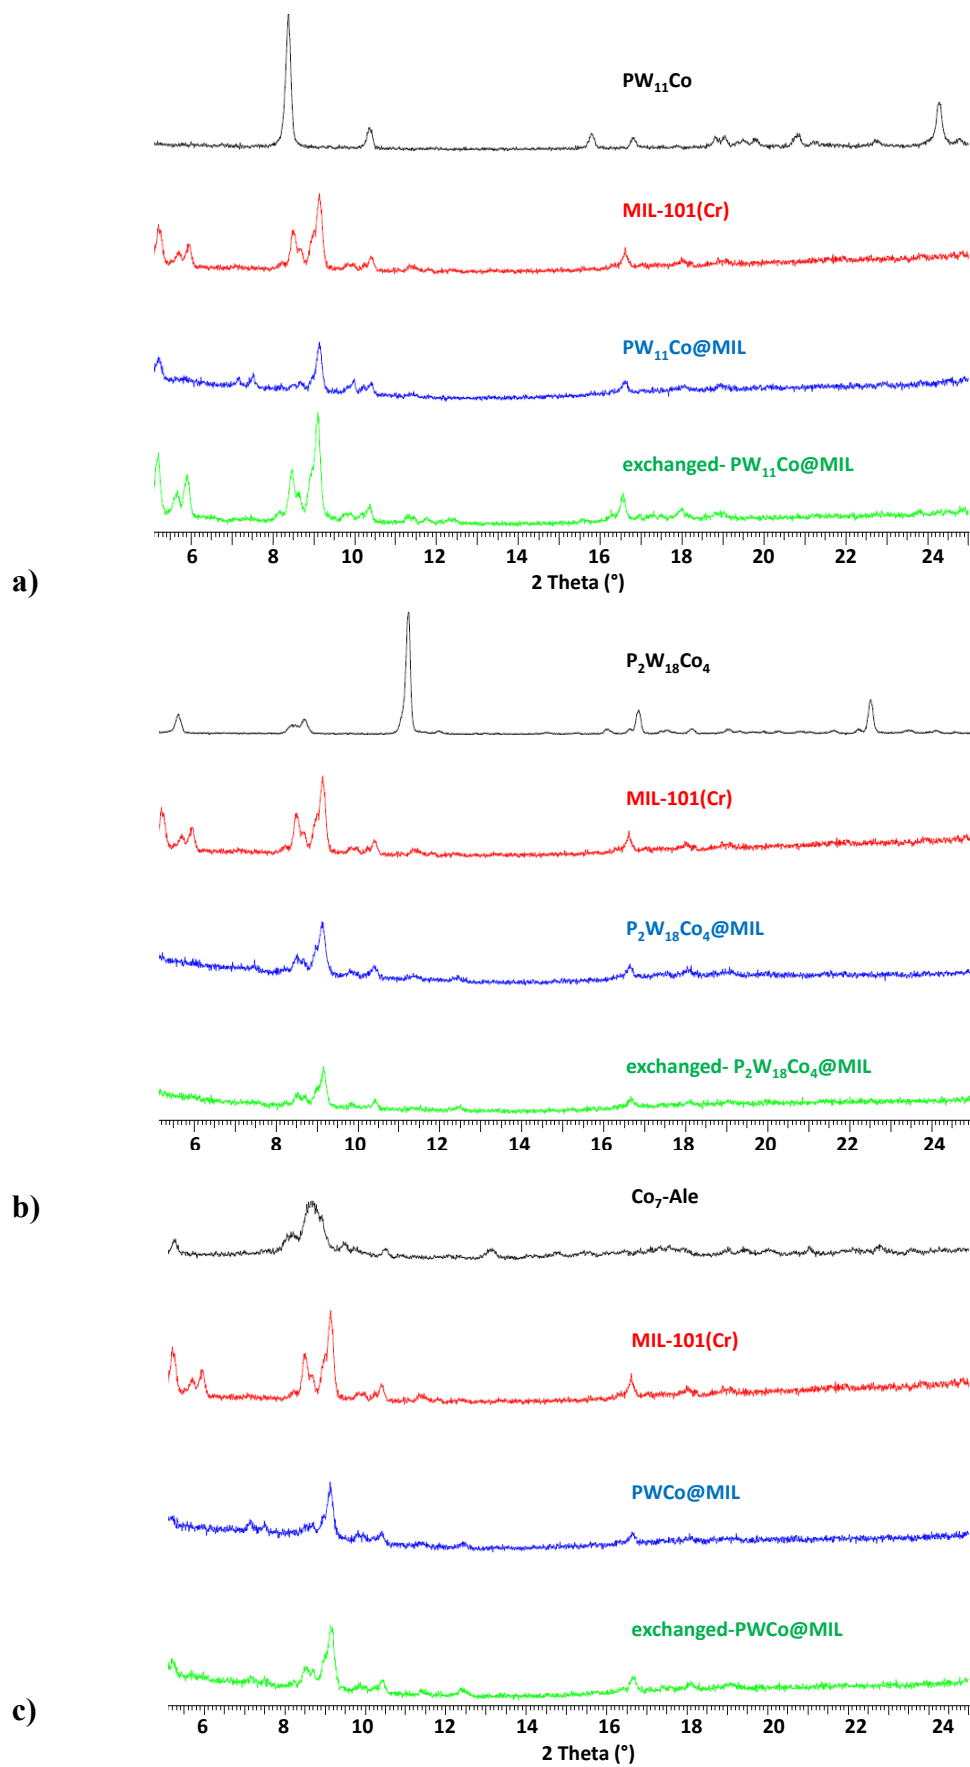

**Fig. S2 A)** Porous distribution by Horvath-Kawazoe method of MIL-101(Cr) (blue),  $\text{PW}_{11}\text{Co@MIL}$  (red),  $\text{P}_2\text{W}_{18}\text{Co}_4\text{@MIL}$  (green) and  $\text{PWCo@MIL}$  (purple).

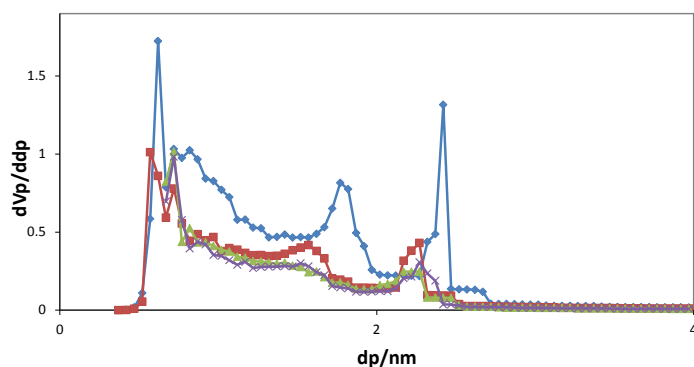

**B)**  $\text{N}_2$  adsorption/desorption isotherm (left) and porous distribution (right) of MIL-101(Cr) (red),  $\text{PW}_{11}\text{Co@MIL}$  (blue) and exchanged- $\text{PW}_{11}\text{Co@MIL}$  (green).

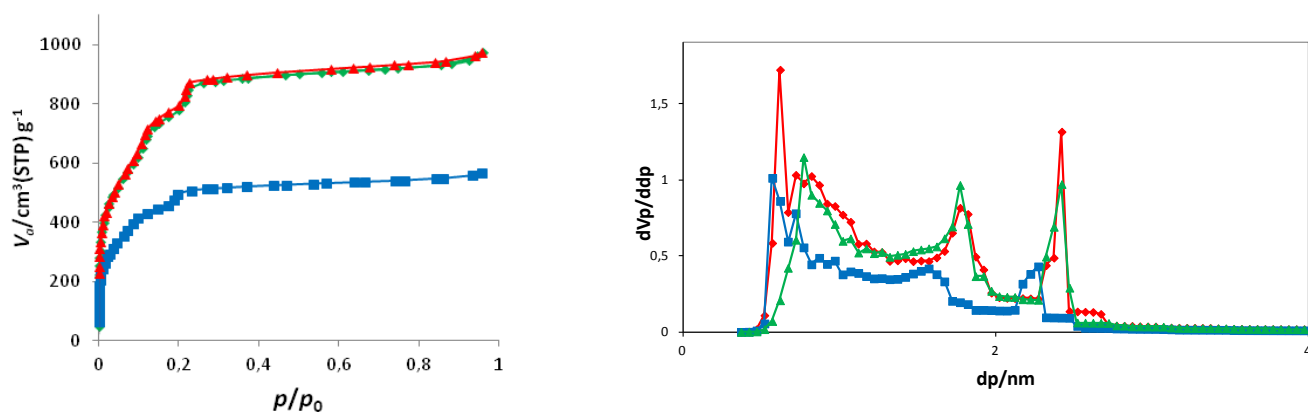

**C)**  $\text{N}_2$  adsorption/desorption isotherm (left) and porous distribution (right) of MIL-101(Cr) (red),  $\text{P}_2\text{W}_{18}\text{Co}_4\text{@MIL}$  (blue) and exchanged- $\text{P}_2\text{W}_{18}\text{Co}_4\text{@MIL}$  (green).

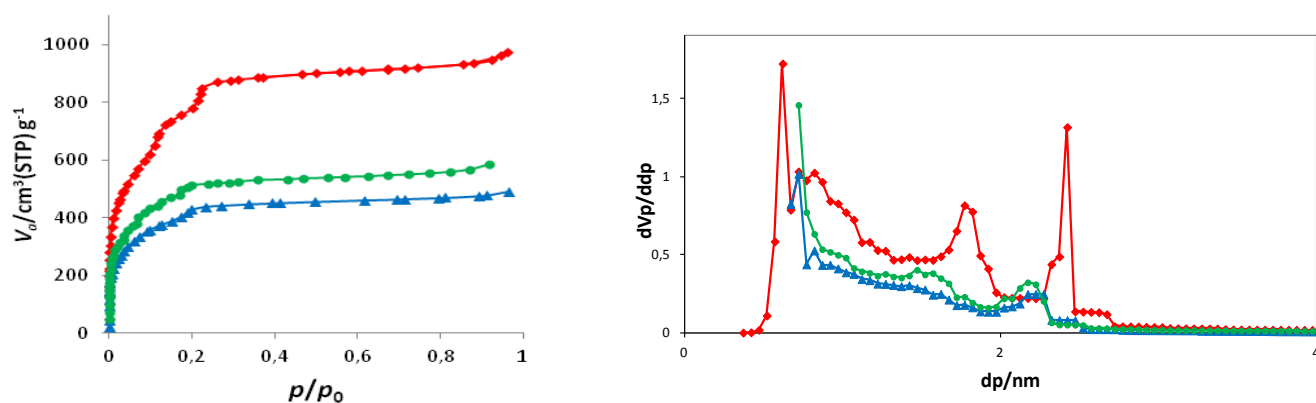

**Table S1.** Specific surface area, total pore volume and maxima for pore size distribution.

|                                                               | Big cavity<br>d(nm ) | Small cavity<br>d(nm ) | S BET<br>(m <sup>2</sup> g <sup>-1</sup> ) | Total pore volume<br>(cm <sup>3</sup> g <sup>-1</sup> ) |
|---------------------------------------------------------------|----------------------|------------------------|--------------------------------------------|---------------------------------------------------------|
| MIL-101(Cr)                                                   | 2.42                 | 1.77                   | 3007                                       | 1.507                                                   |
| PW <sub>11</sub> Co@MIL                                       | 2.27                 | 1.57                   | 1785                                       | 0.873                                                   |
| exchanged-PW <sub>11</sub> Co@MIL                             | 2.42                 | 1.77                   | 3047                                       | 1.504                                                   |
| P <sub>2</sub> W <sub>18</sub> Co <sub>4</sub> @MIL           | 2.22                 | ~ 1.5                  | 1534                                       | 0.760                                                   |
| exchanged-P <sub>2</sub> W <sub>18</sub> Co <sub>4</sub> @MIL | 2.17                 | 1.57                   | 1823                                       | 0.904                                                   |
| PWCo@MIL                                                      | 2.27                 | 1.52                   | 1432                                       | 0.704                                                   |

**Table S2.** Semi-quantitative EDX analysis ; the reported experimental ratios result from an average of 5 to 10 measurements.

|                                                                                                                                                                                                                                                                                                                                                                                         | W/P  | W/Co | W/Cr | Cl/Cr |
|-----------------------------------------------------------------------------------------------------------------------------------------------------------------------------------------------------------------------------------------------------------------------------------------------------------------------------------------------------------------------------------------|------|------|------|-------|
| <b>Experimental values for PW<sub>11</sub>Co@MIL</b>                                                                                                                                                                                                                                                                                                                                    | 13.2 | 14.5 | 0.72 | -     |
| Calc. value for [Cr <sub>3</sub> (H <sub>2</sub> O) <sub>3</sub> O(O <sub>2</sub> CC <sub>6</sub> H <sub>4</sub> CO <sub>2</sub> ) <sub>3</sub> ][PW <sub>11</sub> O <sub>39</sub> Co(H <sub>2</sub> O)] <sub>0.2</sub>                                                                                                                                                                 | 11   | 11   | 0.73 | -     |
| <b>Experimental values for exchanged-PW<sub>11</sub>Co@MIL</b>                                                                                                                                                                                                                                                                                                                          | 10.1 | 14.4 | 0.03 | 0.38  |
| Calc. value for [Cr <sub>3</sub> (H <sub>2</sub> O) <sub>3</sub> O(O <sub>2</sub> CC <sub>6</sub> H <sub>4</sub> CO <sub>2</sub> ) <sub>3</sub> ][PW <sub>11</sub> O <sub>39</sub> Co(H <sub>2</sub> O)] <sub>0.01</sub> Cl <sub>0.95</sub>                                                                                                                                             | 11   | 11   | 0.03 | 0.32  |
| <b>Experimental values for P<sub>2</sub>W<sub>18</sub>Co<sub>4</sub>@MIL</b>                                                                                                                                                                                                                                                                                                            | 8.2  | 5.3  | 0.72 | -     |
| Calc. value for [Cr <sub>3</sub> (H <sub>2</sub> O) <sub>3</sub> O(O <sub>2</sub> CC <sub>6</sub> H <sub>4</sub> CO <sub>2</sub> ) <sub>3</sub> ][P <sub>2</sub> W <sub>18</sub> O <sub>68</sub> Co <sub>4</sub> (H <sub>2</sub> O) <sub>2</sub> ] <sub>0.1</sub>                                                                                                                       | 9    | 4.5  | 0.60 | -     |
| <b>Experimental values for exchanged-P<sub>2</sub>W<sub>18</sub>Co<sub>4</sub>@MIL</b>                                                                                                                                                                                                                                                                                                  | 9.7  | 5.7  | 0.48 | 0.07  |
| Calc. value for [Cr <sub>3</sub> (H <sub>2</sub> O) <sub>3</sub> O(O <sub>2</sub> CC <sub>6</sub> H <sub>4</sub> CO <sub>2</sub> ) <sub>3</sub> ][P <sub>2</sub> W <sub>18</sub> O <sub>68</sub> Co <sub>4</sub> (H <sub>2</sub> O) <sub>2</sub> ] <sub>0.08</sub> Cl <sub>0.2</sub>                                                                                                    | 9    | 4.5  | 0.48 | 0.07  |
| <b>Experimental values for PWCo@MIL</b>                                                                                                                                                                                                                                                                                                                                                 | 2.9  | 5.4  | 0.65 | -     |
| Calc. value for [Cr <sub>3</sub> (H <sub>2</sub> O) <sub>3</sub> O(O <sub>2</sub> CC <sub>6</sub> H <sub>4</sub> CO <sub>2</sub> ) <sub>3</sub> ][P <sub>2</sub> W <sub>18</sub> O <sub>68</sub> Co <sub>7</sub> (OH) <sub>2</sub> (H <sub>2</sub> O) <sub>4</sub> (O <sub>3</sub> PC(O)(C <sub>3</sub> H <sub>6</sub> N <sub>3</sub> )PO <sub>3</sub> ) <sub>2</sub> ] <sub>0.07</sub> | 3    | 2.6  | 0.42 | -     |
| <b>Experimental values for exchanged-PWCo@MIL</b>                                                                                                                                                                                                                                                                                                                                       | 2.0  | 4.8  | 0.41 | 0.08  |

**Figure S3.** a) UV-vis spectra of a solution of  $P_2W_{18}Co_4$ , same solution 24 h after addition of MIL-101(Cr) and the solution obtained by exchange of  $P_2W_{18}Co_4@MIL$  with LiCl.

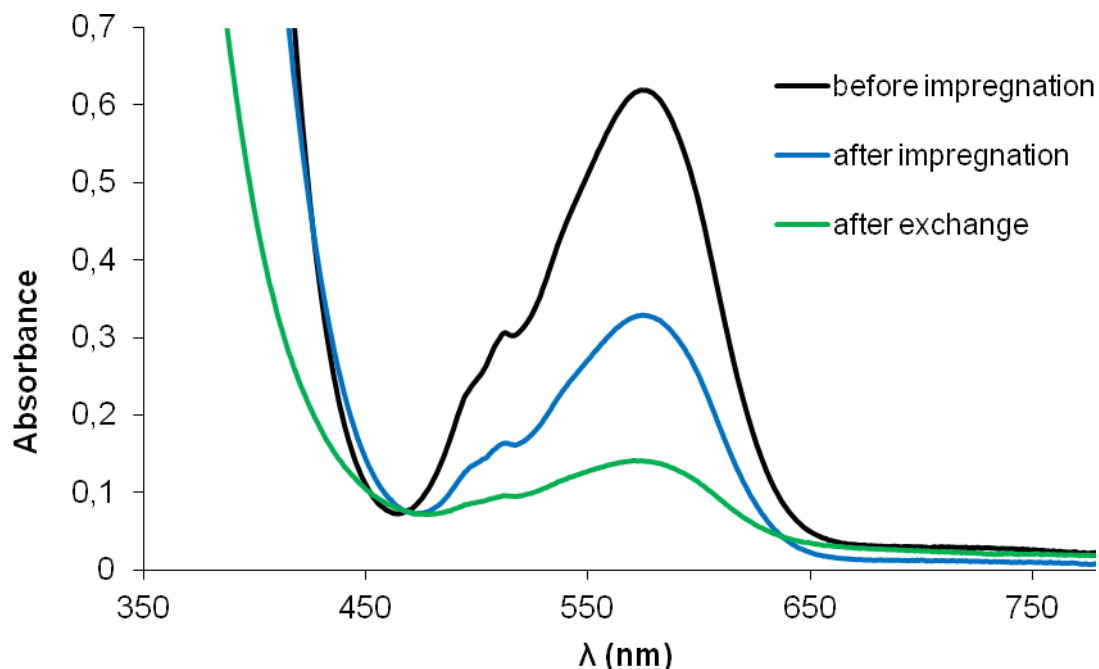

|                                                  | $\lambda$ / nm | $A$   | $c$ / mol l <sup>-1</sup> | $V$ / mL | $n$ / mol            |
|--------------------------------------------------|----------------|-------|---------------------------|----------|----------------------|
| Solution of $P_2W_{18}Co_4$ before impregnation  | 574            | 0.619 | $3.64 \cdot 10^{-3}$      | 17.5     | $6.34 \cdot 10^{-5}$ |
| Solution of $P_2W_{18}Co_4$ after impregnation   | 574            | 0.329 | $1.93 \cdot 10^{-3}$      | 17.5     | $3.36 \cdot 10^{-5}$ |
| Solution of $P_2W_{18}Co_4@MIL$ after extraction | 574            | 0.142 | $0.83 \cdot 10^{-3}$      | 3        | $2.50 \cdot 10^{-6}$ |

For the impregnation experiment  $K_{10}P_2W_{18}Co_4$  (0.350 g,  $6.34 \cdot 10^{-5}$  mol) was dissolved in 17.5 mL of water before addition of MIL-101(Cr) (0.219 g,  $2.80 \cdot 10^{-4}$  mol). From the table above we can deduce that  $2.98 \cdot 10^{-5}$  mol of POM have been encapsulated for  $2.80 \cdot 10^{-4}$  mol of MIL, that gives a ratio POM/MIL = 0.1 consistent with the formula  $[Cr_3(H_2O)_3O(O_2CC_6H_4CO_2)_3][P_2W_{18}O_{68}Co_4(H_2O)_2]_{0.1}$ .

For the extraction experiment a suspension of  $P_2W_{18}Co_4@MIL$  (0.150 g) in 3 mL of 5 M LiCl was stirred for 24 h at room temperature. This sample of  $P_2W_{18}Co_4@MIL$  contains  $1.24 \cdot 10^{-5}$  mol of POM encapsulated. The results deduced from the UV-vis spectra thus indicate that 20% of the POM has been extracted.

**Figure S4.** a) UV-vis spectra of a solution of  $\text{PW}_{11}\text{Co}$ , same solution 24 h after addition of MIL-101(Cr) and the solution obtained by exchange of  $\text{PW}_{11}\text{Co}@MIL$  with LiCl.

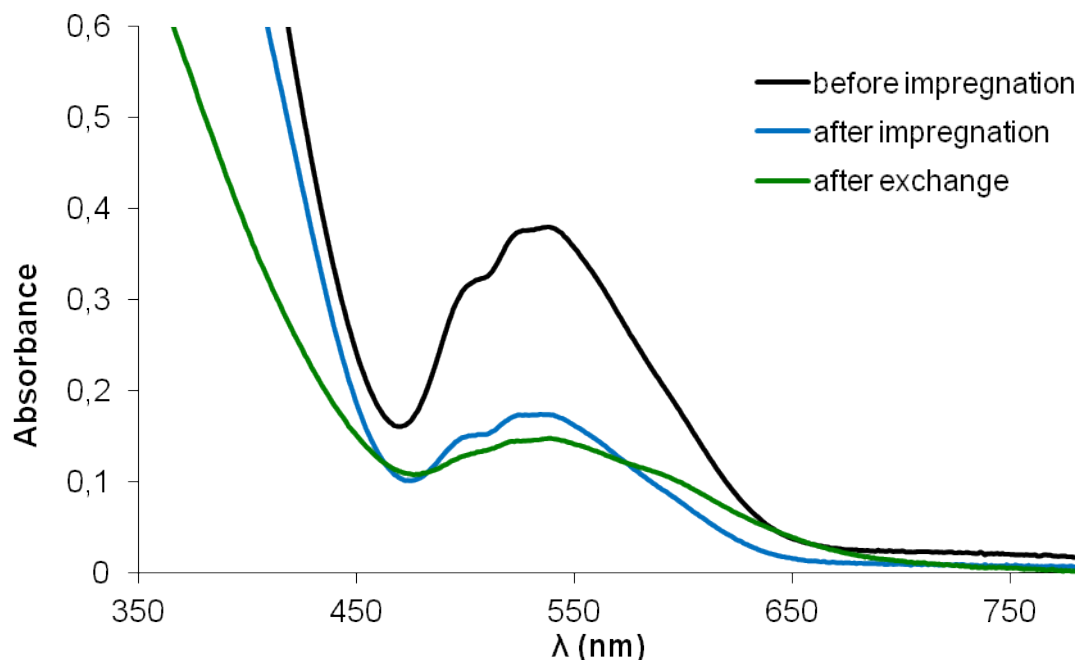

|                                                            | $\lambda / \text{nm}$ | $A$   | $c / \text{mol l}^{-1}$ | $V / \text{mL}$ | $n / \text{mol}$     |
|------------------------------------------------------------|-----------------------|-------|-------------------------|-----------------|----------------------|
| Solution of $\text{PW}_{11}\text{Co}$ before impregnation  | 538                   | 0.381 | $5.61 \cdot 10^{-3}$    | 20              | $1.12 \cdot 10^{-4}$ |
| Solution of $\text{PW}_{11}\text{Co}$ after impregnation   | 538                   | 0.174 | $2.56 \cdot 10^{-3}$    | 20              | $5.12 \cdot 10^{-5}$ |
| Solution of $\text{PW}_{11}\text{Co}@MIL$ after extraction | 538                   | 0.149 | $2.19 \cdot 10^{-3}$    | 10              | $2.19 \cdot 10^{-5}$ |

For the impregnation experiment  $\text{Cs}_5\text{PW}_{11}\text{Co}$  (0.400 g,  $1.12 \cdot 10^{-4}$  mol) was dissolved in 20 mL of water before addition of MIL-101(Cr) (0.250 g,  $3.20 \cdot 10^{-4}$  mol). From the table above we can deduce that  $6.08 \cdot 10^{-5}$  mol of POM have been encapsulated for  $3.20 \cdot 10^{-4}$  mol of MIL, that gives a ratio  $\text{POM}/\text{MIL} = 0.19$  consistent with the formula  $[\text{Cr}_3(\text{H}_2\text{O})_3\text{O}(\text{O}_2\text{CC}_6\text{H}_4\text{CO}_2)_3][\text{PW}_{11}\text{O}_{39}\text{Co}(\text{H}_2\text{O})]_{0.2}$ .

For the extraction experiment a suspension of  $\text{PW}_{11}\text{Co}@MIL$  (0.250 g) in 10 mL of 5 M LiCl was stirred for 24 h at room temperature. This sample of  $\text{PW}_{11}\text{Co}@MIL$  contains  $3.00 \cdot 10^{-5}$  mol of POM encapsulated. The results deduced from the UV-vis spectra thus indicate that at least 73% of the POM has been extracted.

**Figure S5.** a) Visible spectra of a solution of Co<sub>7</sub>-Ale, same solution 24h after addition of MIL-101(Cr) and the solution obtained by exchange of PWCo@MIL with LiCl; b) comparison of the spectra of the solution obtained after exchange of the POM from PWCo@MIL and P<sub>2</sub>W<sub>18</sub>Co<sub>4</sub>@MIL.

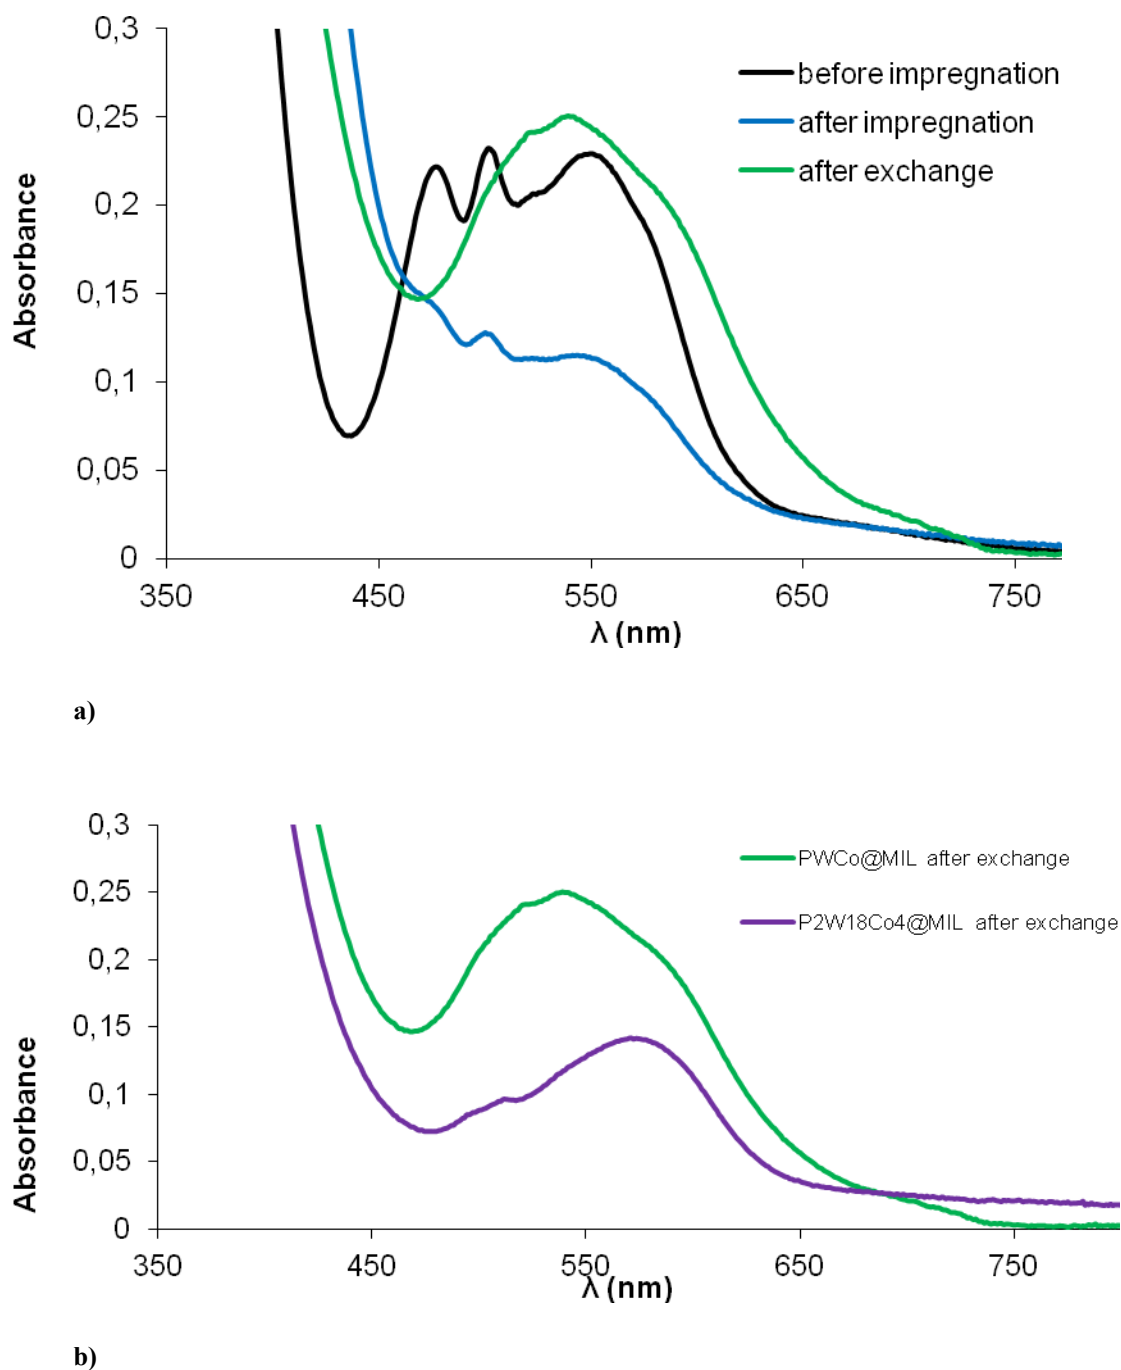

For the impregnation experiment  $\text{Na}_9(\text{NH}_4)_5[(\text{PW}_9\text{O}_{34})_2\text{Co}_7(\text{OH})_2(\text{H}_2\text{O})_4(\text{O}_3\text{PC}(\text{O})(\text{C}_3\text{H}_6\text{NH}_3)\text{PO}_3)_2] \cdot 35\text{H}_2\text{O}$  (0.246 g,  $3.84 \cdot 10^{-5}$  mol) was dissolved in 15 mL of water before addition of MIL-101(Cr) (0.200 g,  $2.56 \cdot 10^{-4}$  mol). For the extraction experiment a suspension of PWCo@MIL (0.150 g) in 3 mL of 5M LiCl in D<sub>2</sub>O was stirred for 24 h at room temperature.

**Figure S6.** Comparison of  $^{31}\text{P}$  NMR spectra of an aqueous solution of  $\text{PW}_{11}\text{Co}$  a) before and b) after impregnation.

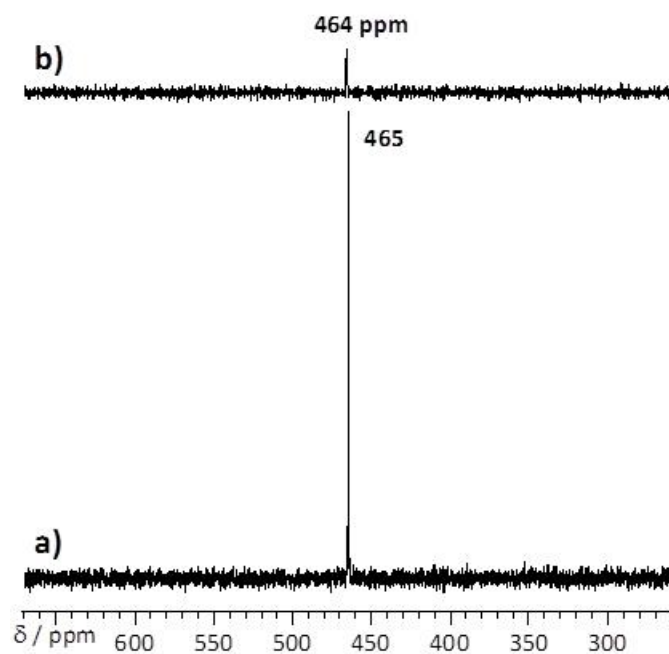

**Figure S7.** Infra-red spectra of MIL-101(Cr), POM@MIL and POM@MIL after exchange with LiCl for the a)  $\text{PW}_{11}\text{Co}$ , b)  $\text{P}_2\text{W}_{18}\text{Co}_4$  and c)  $\text{Co}_7\text{-Ale}$  POM precursors.

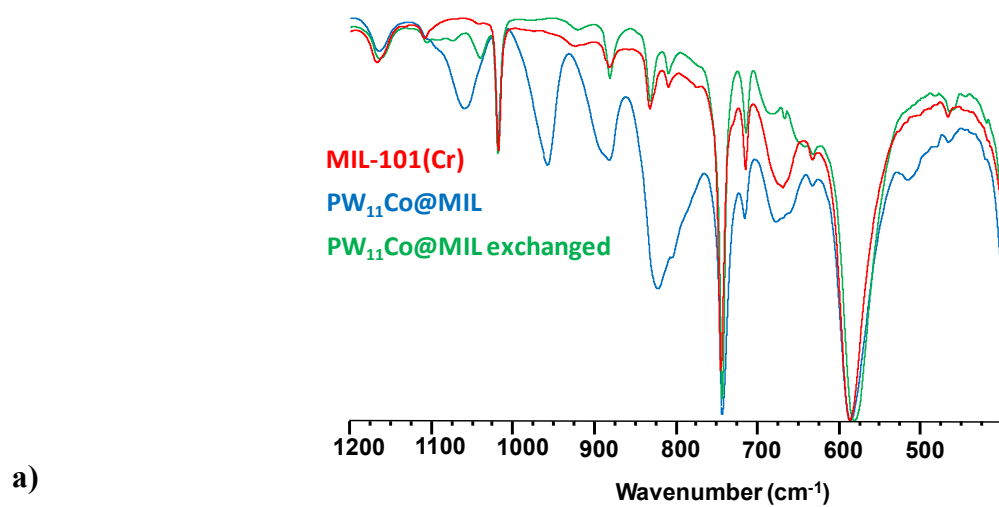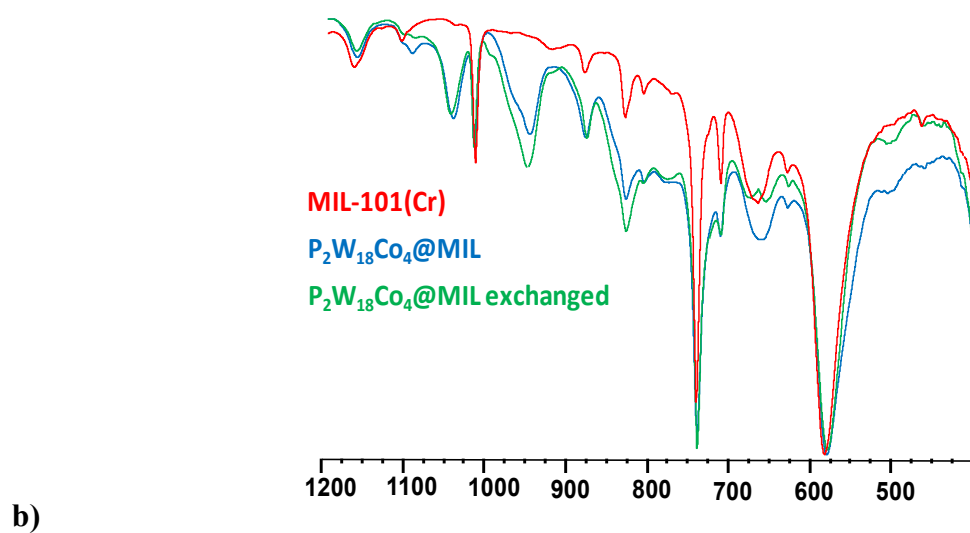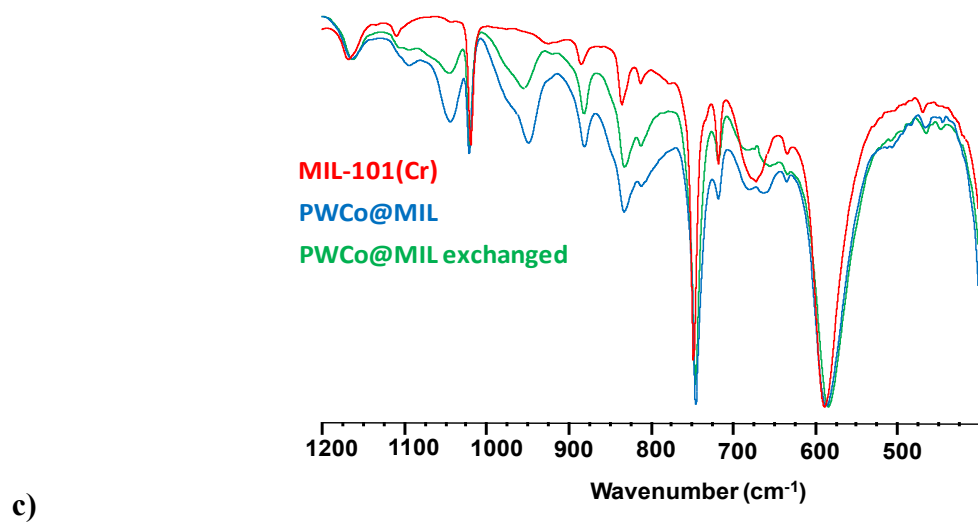

Supplement: c4dt01286k1.pdf [file c4dt01286k1.pdf]
